# Supplementary material for: Regulation of hematogenous tumor metastasis by acid sphingomyelinase
Source: PubMed Central journal article supplement (PMC4459814; doi:10.15252/emmm.201404571), 2015-04-07

# **Regulation of hematogenous tumor metastasis by acid sphingomyelinase**

**Alexander Carpinteiro<sup>1,2</sup>, Katrin Anne Becker<sup>1</sup>, Lukasz Japtok<sup>3</sup>, Gabriele Hessler<sup>1</sup>, Simone Keitsch<sup>1</sup>, Miroslava Pozgajova<sup>4</sup>, Kurt W. Schmid<sup>5</sup>, Constantin Adams<sup>1</sup>, Stefan Müller<sup>6</sup>, Burkhard Kleuser<sup>3</sup>, Michael J. Edwards<sup>7</sup>, Heike Grassmé<sup>1</sup>, Iris Helfrich<sup>8</sup>, Erich Gulbins<sup>1,7</sup>**

Departments of <sup>1</sup>Molecular Biology, <sup>2</sup>Hematology, <sup>5</sup>Pathology and Neuropathology, <sup>6</sup>Nuclear Medicine and <sup>8</sup>Dermatology of the University of Duisburg-Essen, Hufelandstrasse 55, 45122 Essen, Germany; <sup>3</sup>Institute for Nutritional Science, University of Potsdam, 14558 Nuthetal, Germany; <sup>4</sup>Slovak University of Agriculture, Department of Genetics and Breeding Biology, Tr. A Hlinku 2, 94976 Nitra, Slovakia; <sup>7</sup>Department of Surgery, University of Cincinnati, Cincinnati, USA.

Table of contents:

Page 2: Supplementary Legends

Page 3: Supplementary Figure 1: Sphingosine 1-phosphate after co-incubation of B16F10 tumor cells with platelets

Page 4: Supplementary Figure 2: H<sup>+</sup>-ATPase clusters in ceramide-enriched membrane domains after co-incubation of tumor cells with platelets

Supplementary Figure 1: Sphingosine 1-phosphate after co-incubation of B16F10 tumor cells with platelets

Co-incubation of B16F10 melanoma cells with wild type platelets does not result in formation of S1P as determined by mass spectrometry. Likewise, *in vivo* inhibition of glucosyltransferases or sphingosine kinases by application of PDMP or SKI does not alter B16F10 tumor metastasis. Shown is the mean  $\pm$  SD, from 4 independent samples, ANOVA.

Supplementary Figure 2: H<sup>+</sup>-ATPase clusters in ceramide-enriched membrane domains after co-incubation of tumor cells with platelets

H<sup>+</sup>-ATPase clusters in ceramide-enriched membrane domains on the surface of B16F10 cells after co-incubation of the tumor cells with platelets. Tumor cells were co-incubated with platelets for 60 seconds, fixed in 2% buffered PFA (pH 7.4) for 10 min, washed, blocked with H/S supplemented with 5% FCS and 0.01% Tween 20, washed, stained with anti-H<sup>+</sup>-ATPase antibodies (Santa Cruz Inc.) and anti-ceramide antibodies for 45 min, washed again and stained with FITC-labelled anti-goat and Cy3-labelled anti-mouse IgM antibodies. Finally, cells were washed, embedded in Mowiol and analysed by confocal microscopy. Shown are representative studies from 3 independent experiments.

## Supplementary Figure 1

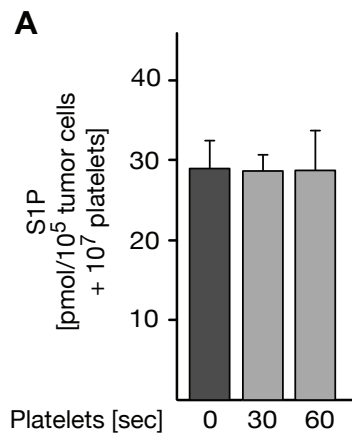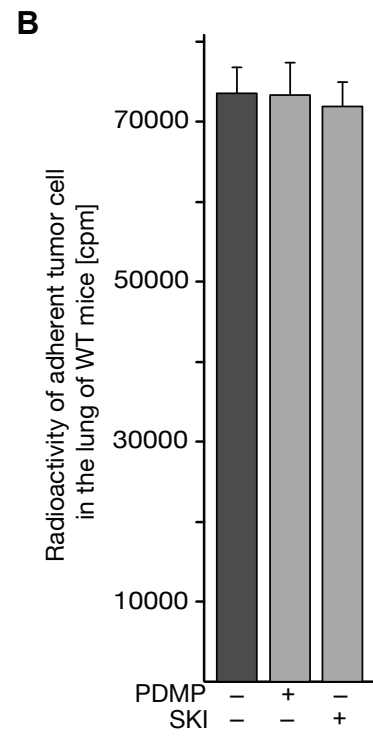

## Supplementary Figure 2

H<sup>+</sup>-ATPase (FITC)

Ceramide (Cy3)

B16F10 +  
WT-platelets

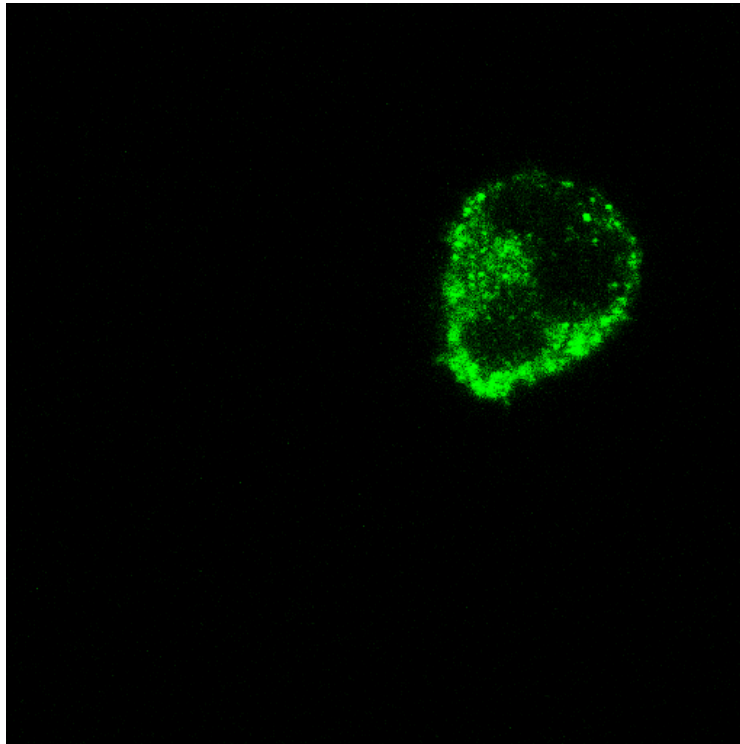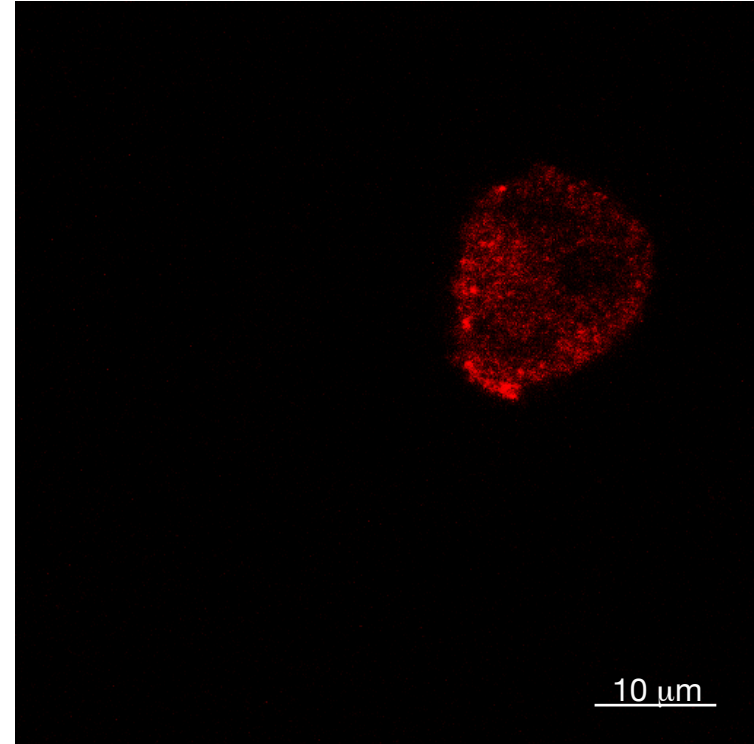

Supplement: emmm0007-0714-sd1.pdf [file emmm0007-0714-sd1.pdf]
